# Supplementary material for: Prevascularized, multiple-layered cell sheets of direct cardiac reprogrammed cells for cardiac repair
Source: Royal Society of Chemistry journal article supplement (doi:10.1039/d0bm00701c), 2020-01-01
Supplement: d0bm00701c1.pdf [file d0bm00701c1.pdf]

Supporting Information

## **Prevascularized, multiple-layered cell sheets of direct cardiac reprogrammed cells for cardiac repair**

Seuk Young Song<sup>†,1</sup>, Hyeok Kim<sup>†,2,3</sup>, Jin Yoo<sup>†,1</sup>, Sung Pil Kwon<sup>1</sup>, Bong Woo Park<sup>2</sup>, Jin-ju Kim<sup>2,3</sup>, Kiwon Ban<sup>4</sup>, Kookheon Char<sup>1</sup>, Hun-Jun Park<sup>2,3,5,\*</sup>, Byung-Soo Kim<sup>1,6,\*</sup>

<sup>1</sup>School of Chemical and Biological Engineering, Seoul National University, Seoul, 08826, Republic of Korea

<sup>2</sup>Department of Medical Life Science, College of Medicine, The Catholic University of Korea, Seoul, 06591, Republic of Korea

<sup>3</sup>Division of Cardiology, Department of Internal Medicine, Seoul St. Mary's Hospital, Seoul, 06591, Republic of Korea

<sup>4</sup>Department of Biomedical Sciences, City University of Hong Kong, Kowloon Tong, 999077, Hong Kong

<sup>5</sup>Cell Death Disease Research Center, College of Medicine, The Catholic University of Korea, Seoul, 06591, Republic of Korea

<sup>6</sup>Institute of Chemical Processes, BIOMAX, and Engineering Research Institute, Seoul National University, Seoul, 08826, Republic of Korea

<sup>†</sup>These authors contributed equally to this work.

\*Corresponding authors. Email: cardioman@catholic.ac.kr; byungskim@snu.ac.kr

**Table S1. Quantitative real-time polymerase chain reaction(qRT-PCR) primer sequences**

| Gene          | Direction | Sequence                    |
|---------------|-----------|-----------------------------|
| <i>GAPDH</i>  | Forward   | TGC ACC ACC AAC TGC TTA GC  |
|               | Reverse   | GGC ATG GAC TGT GGT CAT GAG |
| <i>TNNT2</i>  | Forward   | GAC AGA GCG GAA AAG TGG GA  |
|               | Reverse   | CCT TCC TCC TCT CAG CCA GA  |
| <i>NPPA</i>   | Forward   | AGC AAG CAG TGG ATT GCT CC  |
|               | Reverse   | CTG GTC TGA CCT AGG AGC TG  |
| <i>RYR2</i>   | Forward   | TGC TCA TTC TTT CAG CCA CCT |
|               | Reverse   | TCC GTG TTT TGT GAT GCA ACT |
| <i>MYH6</i>   | Forward   | AGG TCA ACA AGC TTC GAG CC  |
|               | Reverse   | TTG GCA AGA GTG AGG TTC CC  |
| <i>ACTC1</i>  | Forward   | CAG ACC AGG ACT TGC AAC CT  |
|               | Reverse   | TGC TCA GGG TGT CAA AGC AA  |
| <i>MYL2</i>   | Forward   | CTC ATC TCT CTC CCC CGA GT  |
|               | Reverse   | CGG CCA CGA AGT ACC CAT AG  |
| <i>CLSTN2</i> | Forward   | AGC GCT AGA AGC GCA C       |
|               | Reverse   | AGC AGC CGC CCA CGA         |
| <i>NFATC2</i> | Forward   | GGC ACG CGG TAG AGA AGA C   |
|               | Reverse   | AGC CTC TCT CTG CAT CTG GA  |

**Table S2. Antibody information**

## Primary antibodies

| Target                        | Reactivity | Manufacturer | Cat. No. | Dilution |
|-------------------------------|------------|--------------|----------|----------|
| Sarcomere alpha actinin (SAA) | human/rat  | Sigma        | A7811    | 1:500    |
| Cardiac troponin T (cTnT)     | human/rat  | abcam        | ab8295   | 1:200    |
| Cardiac troponin T (cTnT)     | human      | abcam        | ab64623  | 1:200    |
| CD31                          | rat        | Novus        | AF3628   | 1:200    |
| CD31                          | human      | abcam        | Ab32457  | 1:200    |

## Secondary antibodies

| Name                                        | Manufacturer | Cat. No. | Dilution |
|---------------------------------------------|--------------|----------|----------|
| FITC-conjugated donkey anti-goat antibody   | Invitrogen   | A11055   | 1:500    |
| TRITC -conjugated goat anti-mouse antibody  | Invitrogen   | A11005   | 1:500    |
| TRITC -conjugated donkey anti-goat antibody | Invitrogen   | A32758   | 1:500    |
| TRITC -conjugated goat anti-rabbit antibody | Invitrogen   | A11012   | 1:500    |

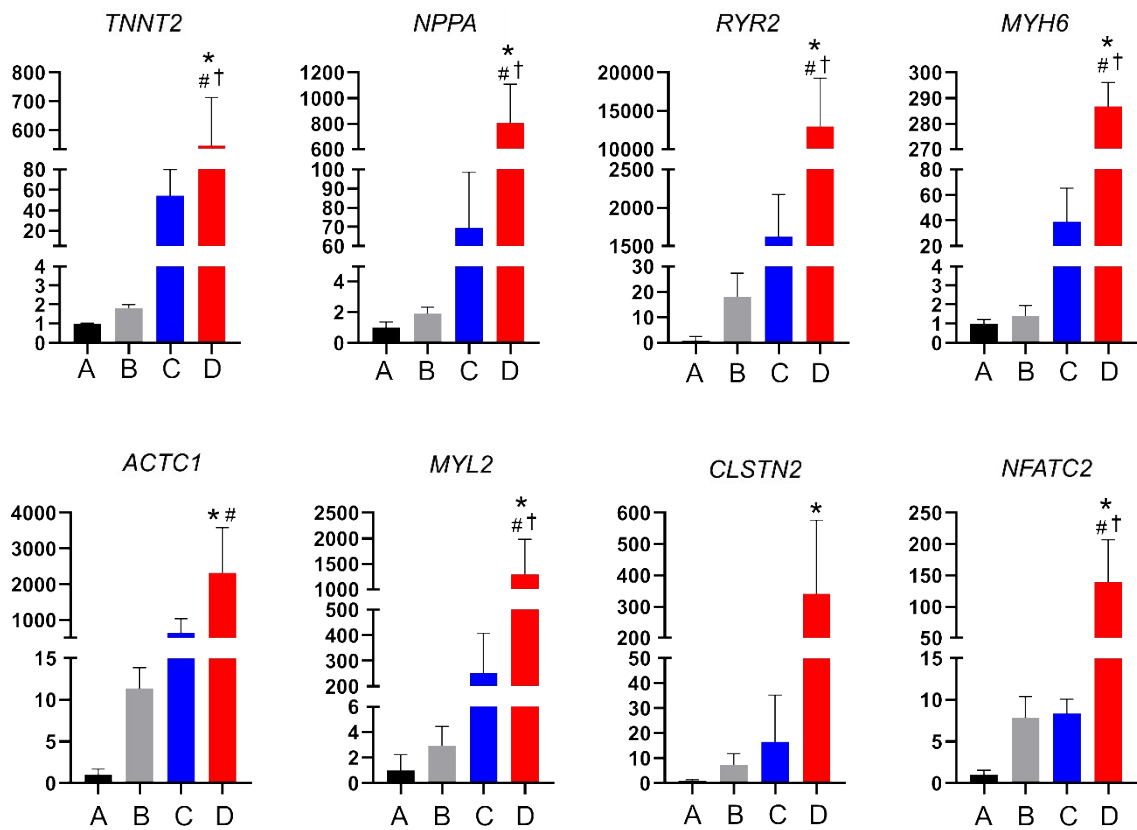

**Figure S1.** mRNA levels of cardiac markers and statistical analysis.

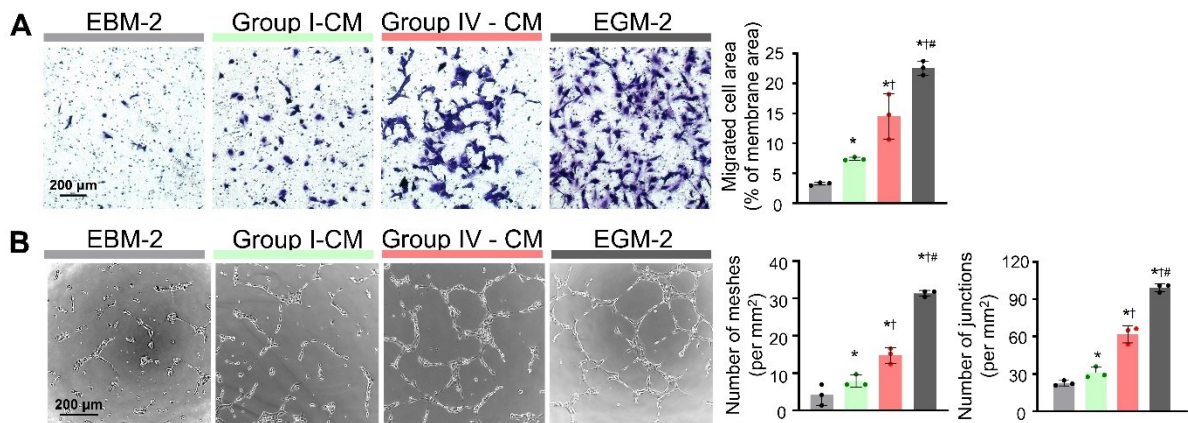

**Figure S2.** Pro-angiogenic paracrine effect of reprogrammed cell sheets. (A) HUVEC migration assay using Transwell (B) HUVEC tube formation assay. \* $p < 0.05$  versus EBM-2 group, † $p < 0.05$  versus Group I-CM group, # $p < 0.05$  versus Group IV-CM group.  $n = 3$  per group.

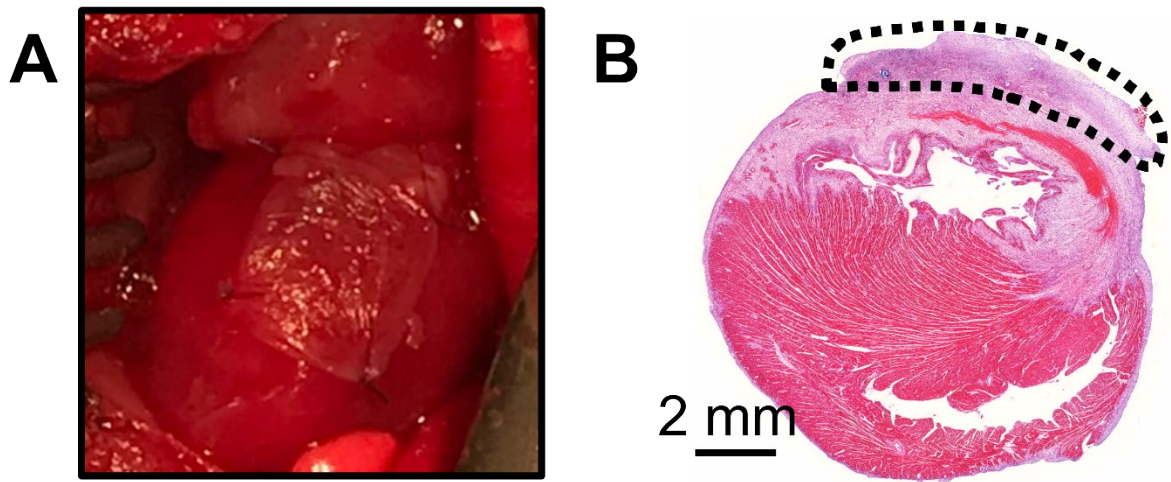

**Figure S3.** The epicardial implant of PMCS on the rat heart (A) and H&E stained section image for confirmation of stable mobilization of PMCS.

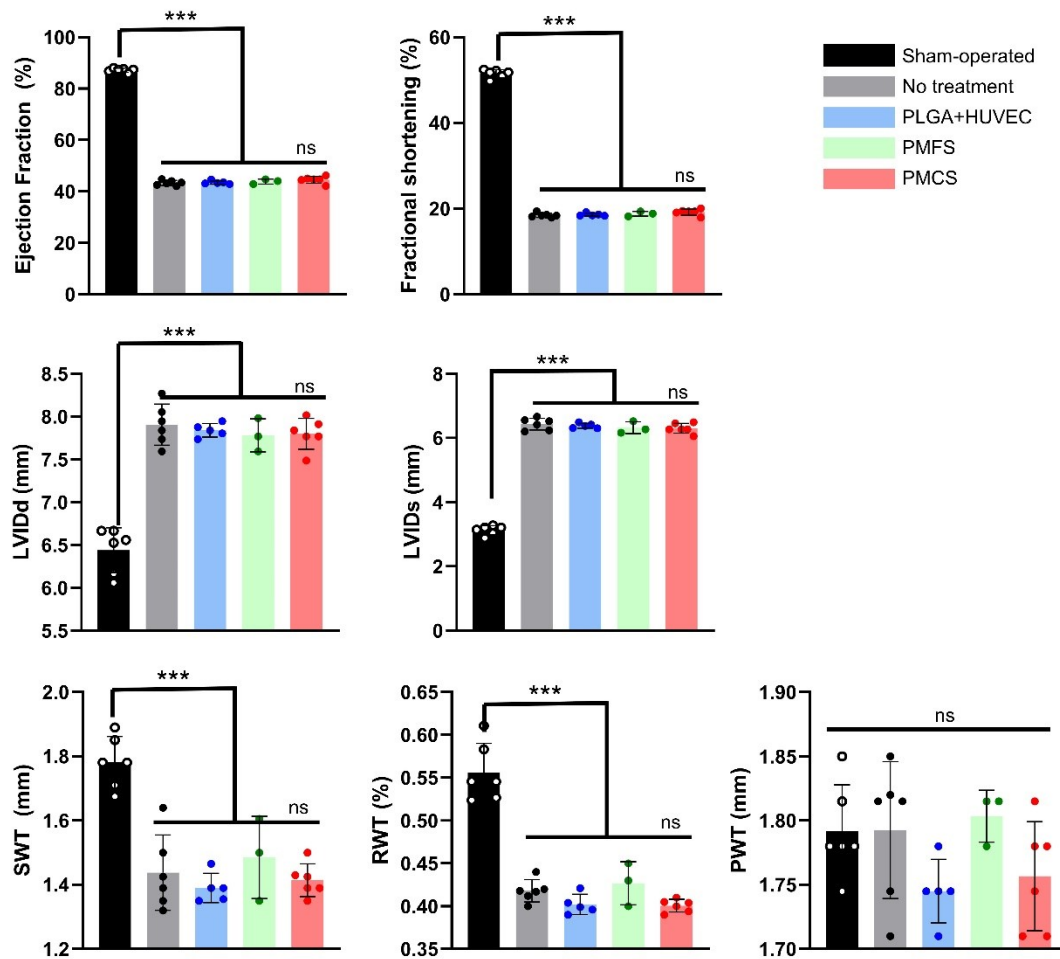

**Figure S4.** MI modeling before treatment compared to the sham-operated group.

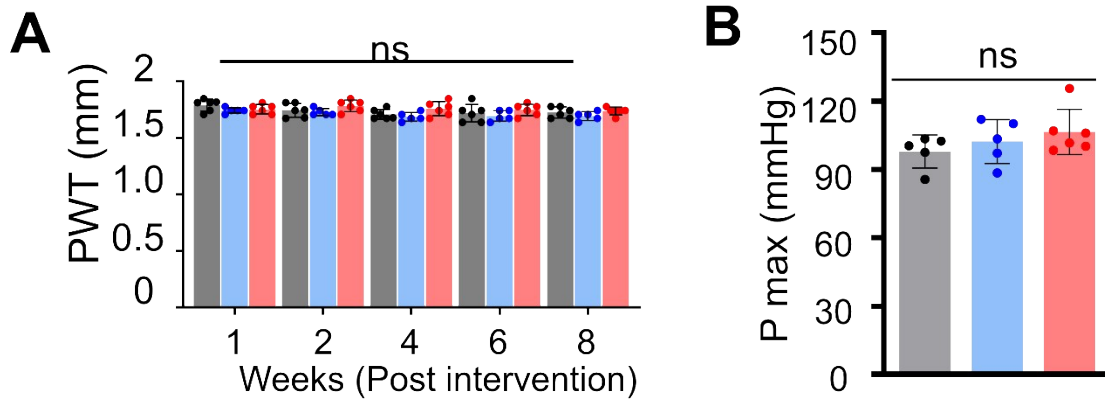

**Figure S5.** (A) Posterior wall thickness in echocardiography and (B) maximum pressure in P-V study

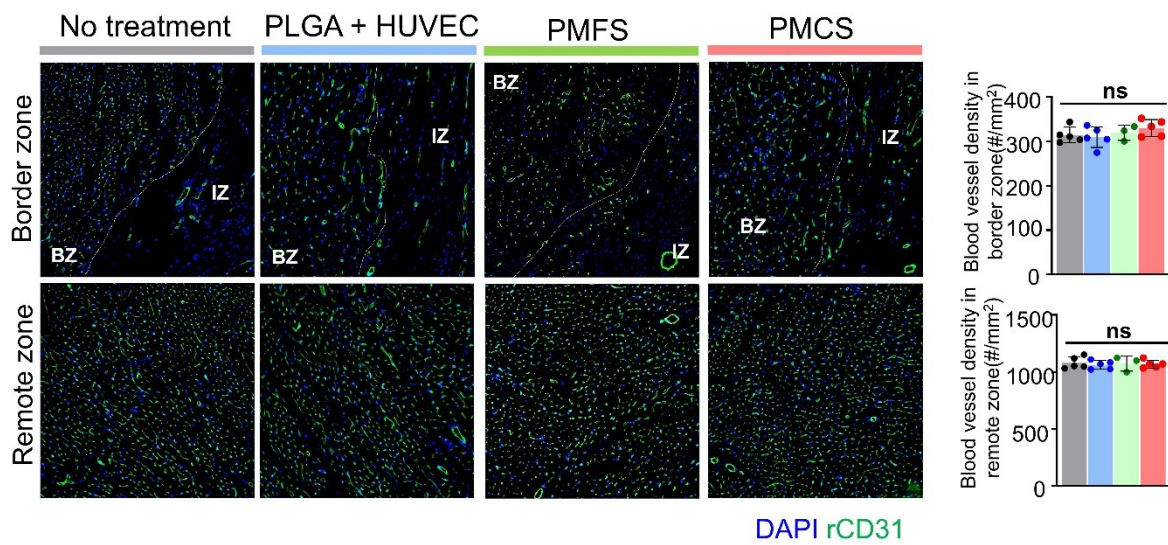

**Figure S6.** Representative images of blood vessels in the border zone and remote zone visualized by immunostaining of CD31 and the quantitative analysis 8 weeks after implant
